# Supplementary material for: Entropic self-assembly of freely rotating polyhedral particles confined to a flat interface
Source: Royal Society of Chemistry journal article supplement (doi:10.1039/c4sm02641a), 2015-01-01
Supplement: c4sm02641a1.pdf [file c4sm02641a1.pdf]

# ENTROPIC SELF-ASSEMBLY OF FREELY ROTATING POLYHEDRAL PARTICLES CONFINED TO A FLAT INTERFACE

## (SUPPLEMENTARY INFORMATION)

V. Thapar, T. Hanrath, and F. A. Escobedo\*

School of Chemical and Biomolecular Engineering, Cornell University  
Ithaca New York 14853

### 1 Phase Behavior of TCs

As shown in Fig. S1, as number density increases the system goes from isotropic to square phase via an intermediate tetratic-like phase which is observed for  $0.64 < \eta^* < 0.72$  and characterized by  $\psi_4$  and  $P_4$  approximately in the range 0.4-0.8, and 0.3-0.45 respectively. Like in cubes, the intermediate phase forms diffuse  $S(\mathbf{k})$  peaks and has liquid like long-range  $g(r)$  behavior (see Fig. S2). Also, similar differences ensue for both cubes and TCs in comparing their confined self-assembly in 2D with the bulk self-assembly in 3D<sup>S1</sup>.

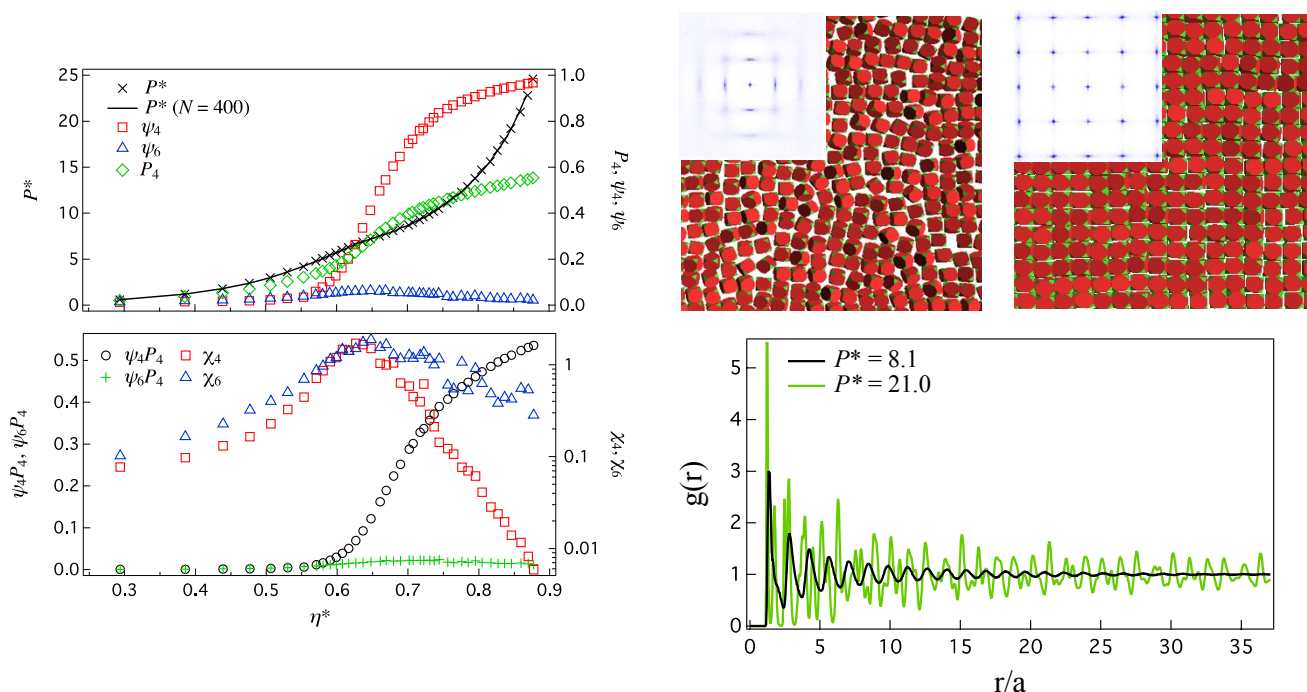

**Fig. S1** Equation of state for 1600 TCs obtained by expansion runs. Legend as in Fig. 1 of main text.

**Fig. S2** (Top Panel) Representative snapshots and corresponding structure factors for a system of  $N=3600$  TCs at (left)  $P^*=8.1$  (tetratic-like phase) and (right)  $P^*=21.0$  (square phase). (Bottom Panel) The radial distribution function for a system of  $N=3600$  TCs at the same two pressures.

## 2 Two-Body potentials of mean force (*PMFs*)

The one-dimensional potential of mean force is defined as<sup>S2</sup>

$$\beta PMF(r) = -\ln \left( \left\langle e^{-\beta U(r)} \right\rangle \right) \quad (1)$$

where  $\beta = 1/(k_B T)$  and  $U(r)$  is the potential energy of interaction between two particles whose centers of mass are at a distance  $r$ . The procedure of calculating  $PMF(r)$  involves placing a particle at random position and orientation with center to center distance  $r$  from another particle with random orientation. This step is followed by an overlap check using separating axes theorem<sup>S3</sup>. The above procedure is repeated for  $10^4$  different positions for each value of  $r$  and  $10^4$  combinations of random orientations of the two particles for each position. The fraction of non-overlapping configurations at each value of  $r$  corresponds to the average Boltzmann's factors in Eq. (1). Figure S3 shows obtained  $PMF(r)$  for different shapes where we set  $r=1$  for the closest distance.

We also obtain the two-dimensional potential of mean force defined as

$$\beta PMF(x, y) = -\ln \left( \left\langle e^{-\beta U(x, y)} \right\rangle \right) \quad (2)$$

where  $U(x, y)$  is the potential energy of interaction between two particles whose centers of mass are at a distance of  $x$  and  $y$  from each other. These distances are defined relative to a coordinate frame whose origin is the center of mass of a particle with fixed position and orientation, and whose axes are perpendicular to the  $\{100\}$  facets of the fixed particle. For convenience, the fixed particle is oriented in a way that one of the  $\{100\}$  facets of a particle is parallel to the flat interface. The procedure of calculating this  $PMF(x, y)$  involves placing a particle at a random orientation with position  $(x, y)$  from the fixed particle followed by an overlap check. This step is repeated for  $10^4$  different orientations for each position. Similar to  $PMF(r)$ , the fraction of non-overlapping configurations at values of  $(x, y)$  corresponds to the average Boltzmann's factors in Eq. (2). Figure S4 shows the contour plots of  $PMF(x, y)$  where for each shape we make the  $x$  and  $y$  distances dimensionless by dividing their values by the closest distance [which was obtained from  $PMF(r)$  and corresponds to the particle indiameter  $\sigma_{in}$ ].

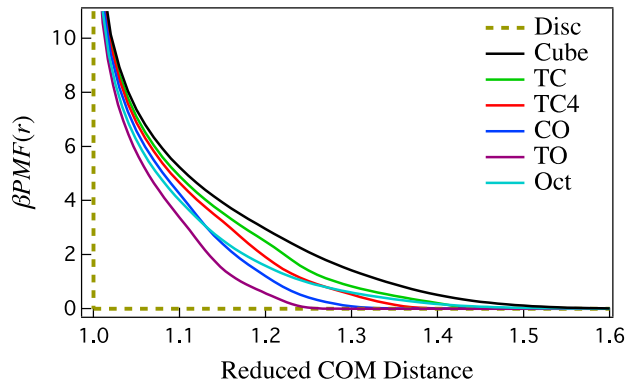

**Fig. S3** One-dimensional potential of mean force,  $PMF(r)$  for different shapes studied in this work.

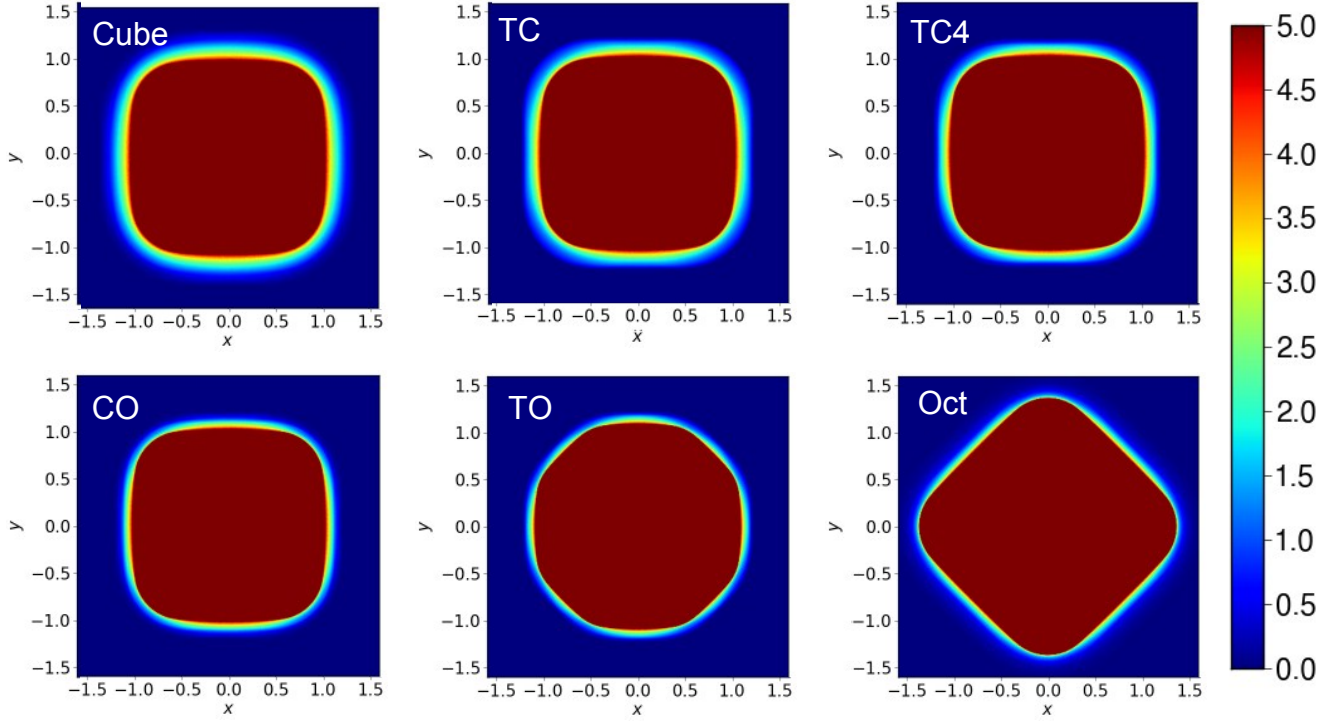

**Fig. S4** Two-dimensional potential of mean force,  $PMF(x,y)$  for different shapes studied in this work. The colorbar varies from  $\beta PMF(x,y) = 0$  to 5. The values of  $\beta PMF(x,y) > 5$  are labeled as red.

### 3 Adsorption Energy

We apply a model used in Refs. S4 and S5 to estimate the adsorption energy of a single particle on a fluid-fluid flat interface. The adsorption energy,  $F$  of a truncated cube as a function of its position and orientation is given by

$$F(z, \delta, \omega) = \gamma_{ib}(A - S_{ib}) + \gamma_{1t}S_{1t} + \gamma_{2t}S_{2t} + \gamma_{1b}S_{1b} + \gamma_{2b}S_{2b} + \text{const.} \quad (3)$$

Here,  $\gamma_{ib}$  is the interfacial tension between the top and bottom fluid,  $A$  is the total surface area of the interface and  $S_{ib}$  is the interfacial area excluded due to the presence of a particle. The surface tension between particle's facets of type  $i$  ( $i = 1, 2$  for  $\{100\}$  and  $\{111\}$  facets respectively) and top fluid is denoted by  $\gamma_{it}$  and the surface tension between particle facets of type  $i$  and bottom fluid is denoted by  $\gamma_{ib}$ . The surface areas of facets of type  $i$  in the bottom and top medium are denoted by  $S_{it}$  and  $S_{ib}$  respectively. The value of the arbitrary additive constant is chosen such that  $F = 0$  when a particle is completely immersed in the bottom fluid. The position or immersion depth of a particle,  $z$ , is the height of its center of mass relative to an interface, which is parallel to the  $xy$  plane with its normal pointing in the  $z$ -axis direction and positioned at  $z = 0$ . The orientation of a truncated cube is given by two angles: the polar angle  $\delta$  and the azimuthal angle  $\omega$ . As shown in Ref. S4, using the Young's equation, Eq. 3 is simplified to

$$F(z, \delta, \beta) = \gamma_{ib}(\cos\theta_1 S_{1t} + \cos\theta_2 S_{2t} - S_{12}) \quad (4)$$

where  $\theta_i$  is the contact angle corresponding to the three-phase contact between facet of type  $i$ , top fluid and bottom fluid. To obtain  $F$  for (experimentally relevant) contact angle values of  $\theta_1$  and  $\theta_2$  for any given  $(z, \delta, \omega)$ , the surface areas  $S_{it}$ ,  $S_{ib}$  and  $S_{ib}$  are estimated using the triangular tessellation technique described in Ref. S6. The three dimensional landscape of adsorption/interfacial energy is then obtained by repeating the procedure for all possible orientations and positions, where we vary,  $z$  within  $(-H, H)$

where  $H$  is a value slightly larger than the circumradius of a shape (for TC4 we use  $H$  as the largest circumscribing radius),  $\delta$  from  $[0, \pi/2]$ , and  $\omega$  from  $[0, \pi/4]$  using 100 equidistant steps for each of these three parameters. Due to the symmetry properties of a truncated cube, the polar angle and azimuthal angle are varied up to  $\pi/2$  and  $\pi/4$  respectively. The most stable configuration is then obtained by estimating the global minimum of this landscape and the value of  $F$  corresponding to the global minimum is denoted as  $F_{minglob}$ . The model also provides the interfacial energy,  $F_{min}(z)$  of a particle as a function of  $z$  minimized with respect to angles  $\delta$  and  $\omega$ . The estimation of  $F_{min}(z)$  at different values of  $z$  is performed for a cube shaped particle of size 3 nm adsorbing on a toluene-air interface at room temperature. The value of interfacial tension,  $\gamma_{tb}$  is given by 28.52 mN/m (room temperature). The profile of  $F_{min}(z)$  versus  $z$  is shown for different contact angles ranging from  $\cos\theta_1 = 0.0$  to  $\cos\theta_1 = 0.5$  in Fig. S5.

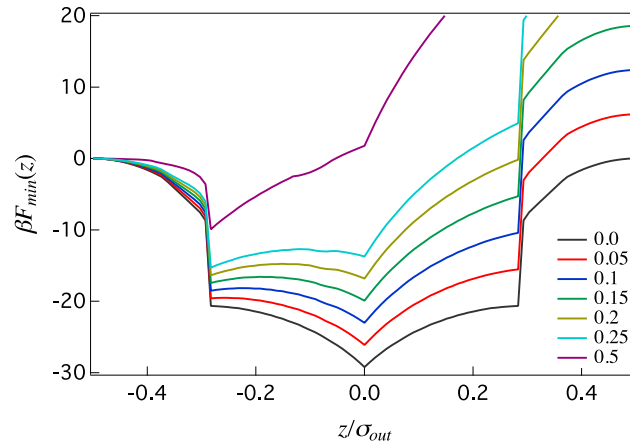

**Fig. S5** The profile of  $F_{min}(z)$  versus  $z$  for a cube shaped particle for different contact angles ranging from  $\cos\theta_1 = 0.0$  to  $\cos\theta_1 = 0.5$  (as per numbers in the inside legend) .

For  $\cos\theta_1 = 0.0$  and  $\cos\theta_2 = 0.0$ , we show the difference  $\Delta F_{orient}(\delta, \omega) = F(z_{opt}, \delta, \omega) - F_{minglob}$  as a function  $\delta$  and  $\omega$  for different shapes in Fig. S6, where the value,  $z_{opt}$  is the immersion depth of the most stable configuration. For the plots shown in Fig. S6, the cube size is 3 nm whereas the size of the other shapes is selected to have the same surface area as that of the 3 nm cube. For each shape, we also show in Fig. 6 snapshots of three different configurations whose  $\Delta F_{orient} \leq 5k_B T$ . We also obtain the percentage of angular phase space,  $P_{orient}$ , that has  $\Delta F_{orient} \leq 5k_B T$ ; this is estimated by evaluating  $\Delta F_{orient}$  over a grid of  $(\delta, \omega)$  pairs and finding the fraction for which  $\Delta F_{orient} \leq 5k_B T$ .

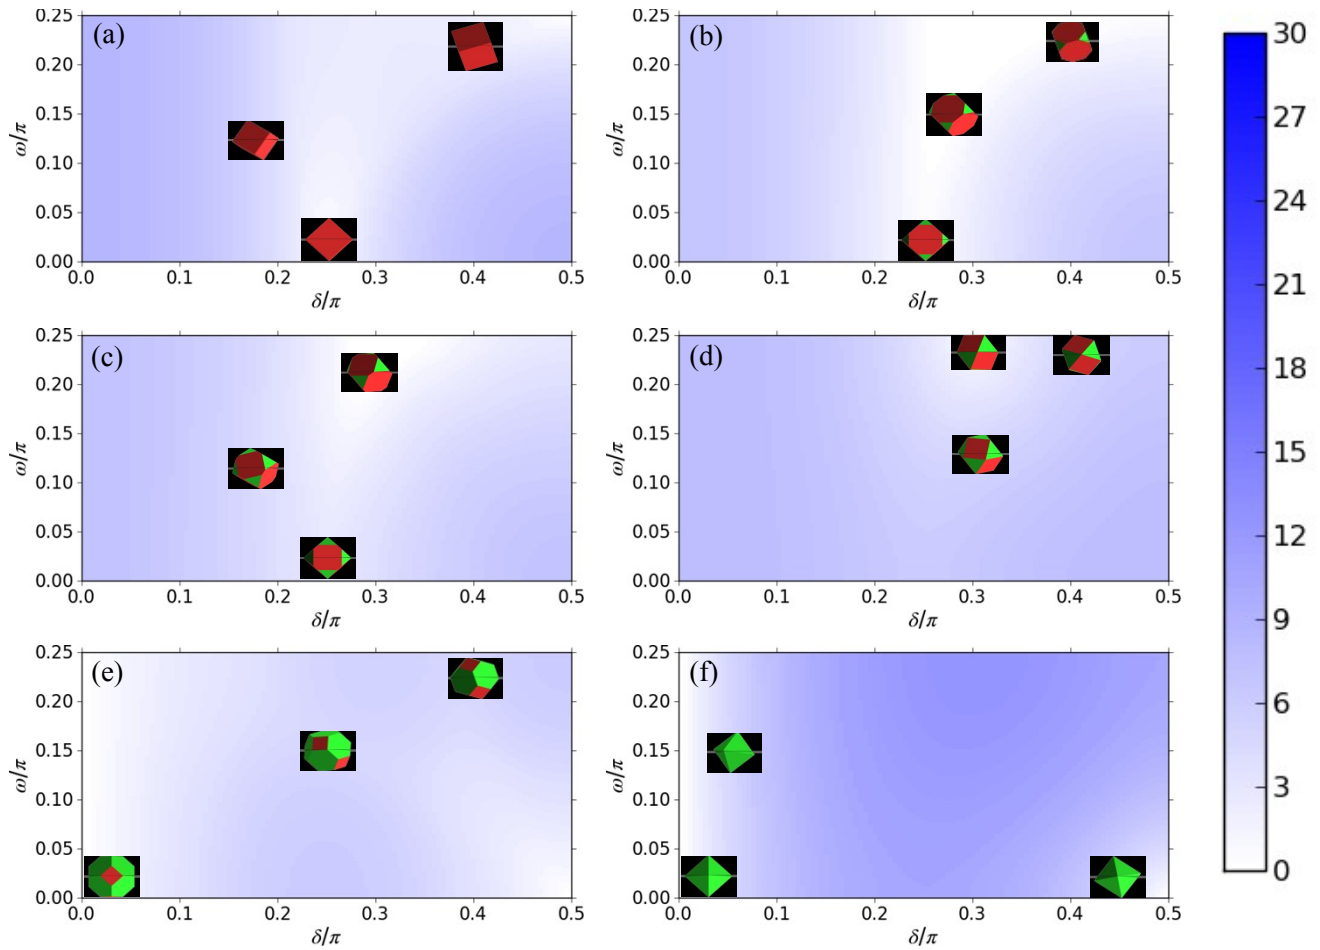

**Fig. S6** The energy difference,  $\Delta F_{orient}$  as a function of  $\delta$  and  $\omega$  for (a) cube, (b) TC, (c) TC4, (d) CO, (e) TO and (f) Oct at contact angle values of  $\theta_1 = 90$  degrees and  $\theta_2 = 90$  degrees. The snapshots of configurations at three different  $(\delta, \omega)$  values with  $\Delta F_{orient} \leq 5k_B T$  are also shown for each shape (the interface plane, perpendicular to the plane of the page, appears as a horizontal line, and for the particles the  $\{100\}$  facets are colored red and the  $\{111\}$  facets are green).

## References:

- S1. A. P. Gantapara, J. de Graaf, R. van Roij, and M. Dijkstra, *Phys. Rev. Lett.*, 2013, **111**, 015501.
- S2. U. Agarwal and F. A. Escobedo, *Nat. Mater.*, 2011, **10**, 230–235.
- S3. E. G. Golshtein and N. V. Tretyakov, *Modified Lagrangians and monotone maps in optimization*, Wiley, New York, 1996.
- S4. W. H. Evers, B. Goris, S. Bals, M. Casavola, J. de Graaf, R. van Roij, M. Dijkstra, and D. Vanmaekelbergh, *Nano Lett.*, 2013, **13**, 2317–2323.
- S5. W. van der Stam, A. P. Gantapara, Q. A. Akkerman, G. Soligno, J. D. Meeldijk, R. van Roij, M. Dijkstra, and C. de Mello Donega, *Nano Lett.*, 2014, **14**, 1032–1037.
- S6. J. de Graaf, M. Dijkstra, and R. van Roij, *J. Chem. Phys.* **132**, 164902 (2010).
